# Supplementary material
Source: PubMed Central journal article supplement (PMC11113940)
Supplement: 18_2012_1230_MOESM5_ESM.pdf [file 18_2012_1230_MOESM5_ESM.pdf]

## Supplementary Figure 1

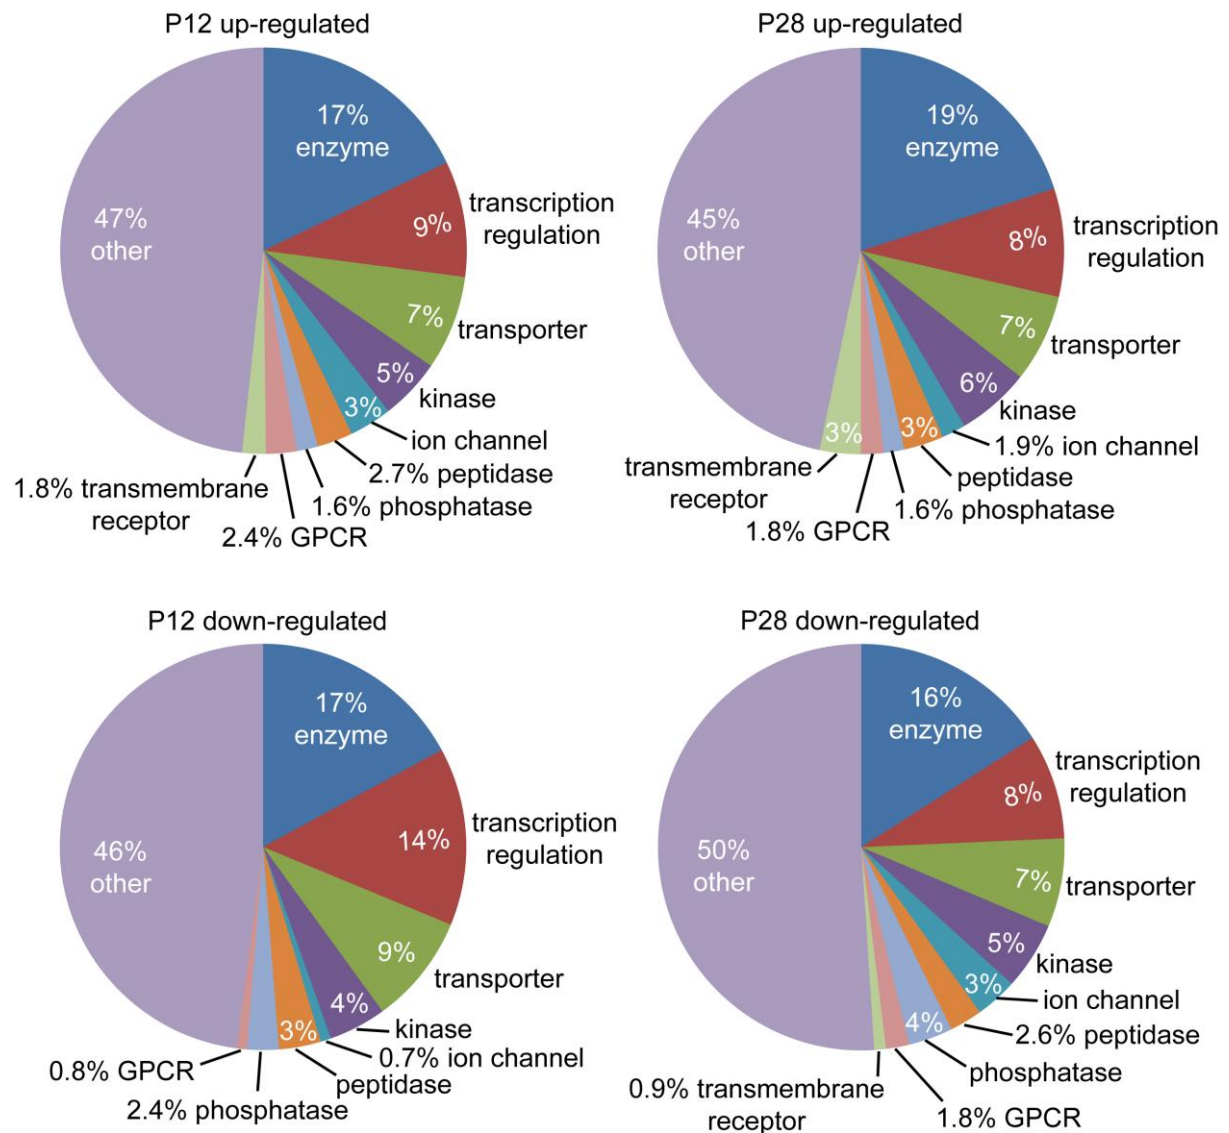

## Supplementary Figure 1

Pie charts showing the percentage of molecule types in the subset of up- or down-regulated genes in the A3B1 retina at P12 or P28.

### Characterization of neurite outgrowth and ectopic synaptogenesis in response to photoreceptor dysfunction Cellular and Molecular Life Sciences

Stylianos Michalakis, Karin Schäferhoff, Isabella Spiwoks-Becker, Nawal Zabouri, Susanne Koch, Fred Koch, Michael Bonin, Martin Biel, Silke Haverkamp

Corresponding authors:

Dr. Stylianos Michalakis, Department of Pharmacy – Center for Drug Research, Ludwig-Maximilians-Universität München, Butenandtstr 7, D-81377 Munich, Germany

michalakis@lmu.de

or

Dr. Silke Haverkamp, Max-Planck-Institute for Brain Research, Neuroanatomy, Deutschordenstrasse 46, D-60528 Frankfurt/M., Germany

silke.haverkamp@brain.mpg.de
