# Supplementary material
Source: PubMed Central journal article supplement (PMC11113940)
Supplement: 18_2012_1230_MOESM6_ESM.pdf [file 18_2012_1230_MOESM6_ESM.pdf]

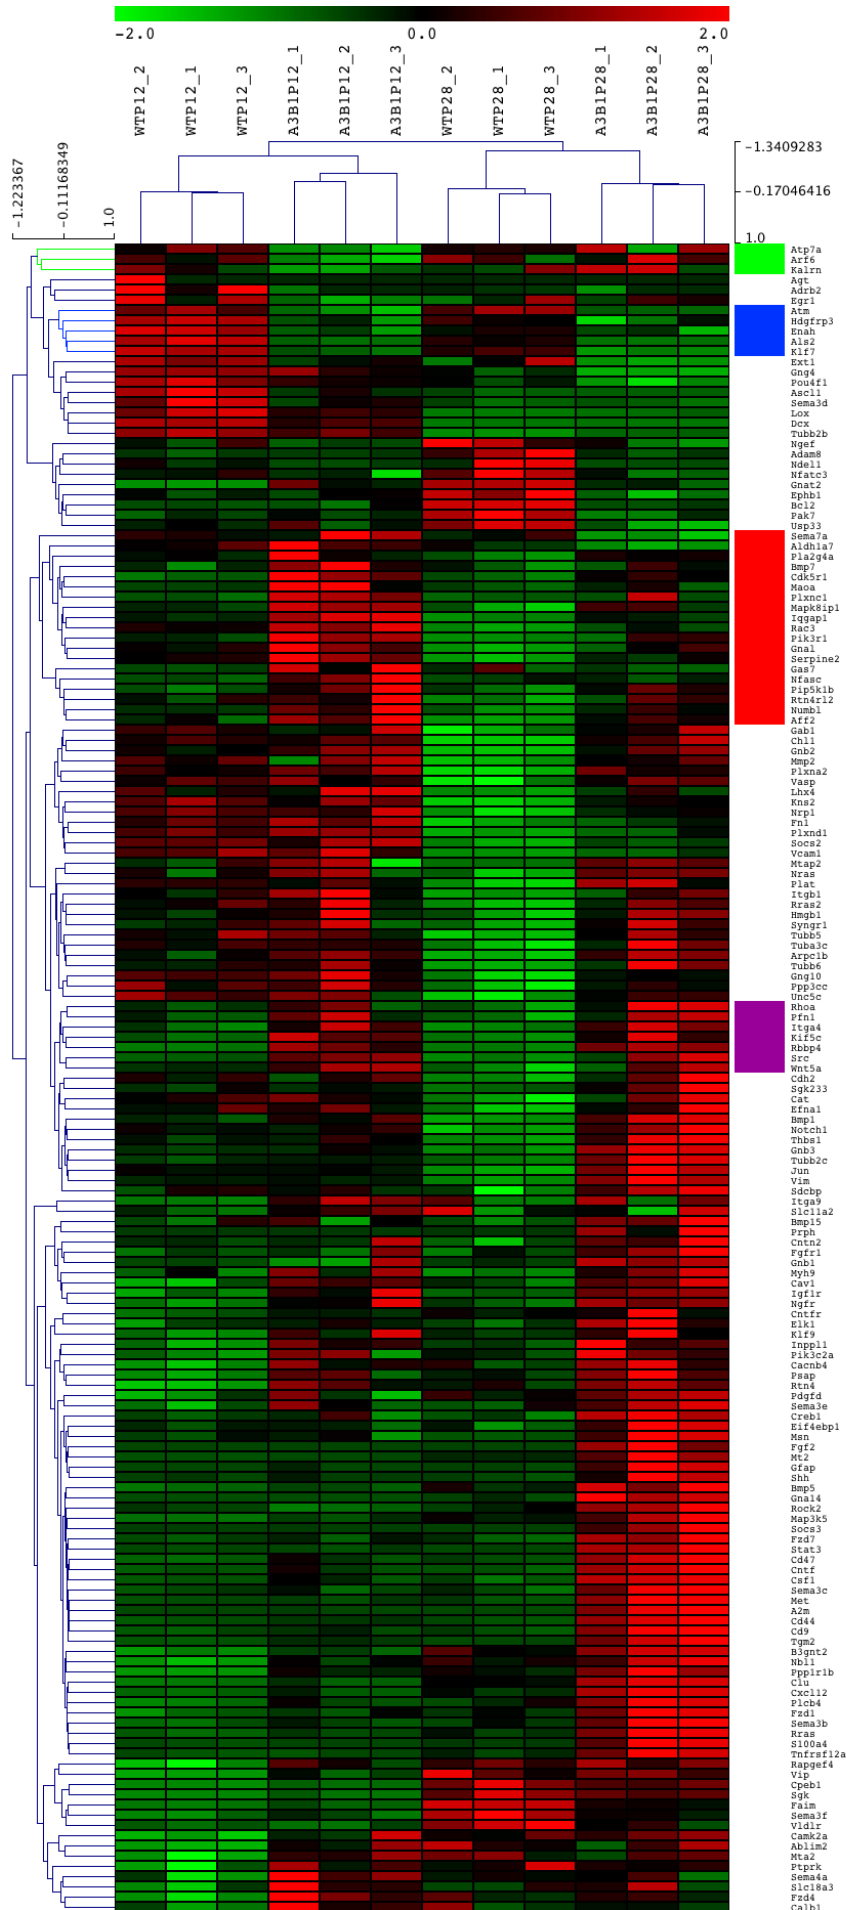

## **Supplementary Figure 2**

Heat map showing the relative expression levels (z-scores) and the hierarchical clustering of the 163 genes related to neurite outgrowth and synapse formation. The cluster of genes specifically up-regulated in the P12 A3B1 retina, up-regulated in the A3B1 retina at both ages, down-regulated in the P12 A3B1 retina, and down-regulated in the A3B1 retina at P12 and P28 are labeled with a red, magenta, green and blue bar respectively.

### **Characterization of neurite outgrowth and ectopic synaptogenesis in response to photoreceptor dysfunction Cellular and Molecular Life Sciences**

Stylianos Michalakis, Karin Schäferhoff, Isabella Spiwoks-Becker, Nawal Zabouri, Susanne Koch, Fred Koch, Michael Bonin, Martin Biel, Silke Haverkamp

Corresponding authors:

Dr. Stylianos Michalakis, Department of Pharmacy – Center for Drug Research, Ludwig-Maximilians-Universität München, Butenandtstr 7, D-81377 Munich, Germany

michalakis@lmu.de

or

Dr. Silke Haverkamp, Max-Planck-Institute for Brain Research, Neuroanatomy, Deutschordenstrasse 46, D-60528 Frankfurt/M., Germany

silke.haverkamp@brain.mpg.de
