# Supplementary material
Source: PubMed Central journal article supplement (PMC11113940)
Supplement: 18_2012_1230_MOESM7_ESM.pdf [file 18_2012_1230_MOESM7_ESM.pdf]

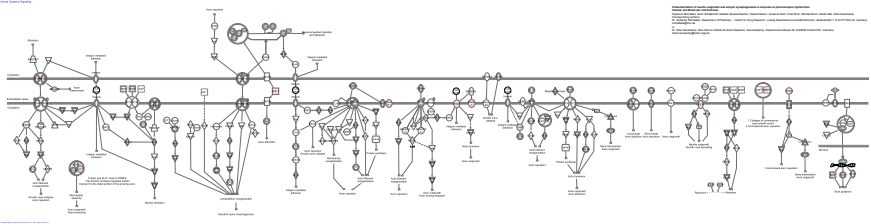

### **Supplementary Figure 3**

Axon guidance signaling Ingenuity canonical pathway with overlaid expression levels in the A3B1 retina. Up-regulated genes are shown in red, down-regulated genes are green. The fold-change values from the microarray are given below the molecules.
